# Supplementary material for: Relevance of the Physicochemical Properties of Calcined Quail Eggshell (CaO) as a Catalyst for Biodiesel Production
Source: Hindawi journal article supplement (doi:10.1155/2017/5679512), 2017-01-01
Supplement: f1 [file 5679512.f1.docx]

**Supplementary material (Table S1-Table S4)**

**Supplementary material (Table S1)**

**Table S1.** Sunflower oil used in study properties. Data are presented as mean ± standard deviation, n = 3.

| **Property** | **Result** |
| --- | --- |
| Acid value (mg KOH g-1) | 0.21 ± 0.02 |
| Water content (mg.kg-1) | 90 ± 2 |
| Density at 20 oC (kg.m-3) | 918.80 ± 1.30 |
| Kinematic viscosity at 40 oC (mm2 s-1) | 33.53 ± 0.34 |
| Fatty acid (wt. %) | |
| Caprylic acid (C8:0) | ≤ 0.001 |
| Caproic acid (C10:0) | ≤ 0.005 |
| Lauric acid (C12:0) | 0.05 ± 0.01 |
| Myristic acid (C14:0) | 0.09 ± 0.01 |
| Palmitic acid (C16:0) | 5.28 ± 0.02 |
| Palmitoleic acid (C16:1) | 0.26 ± 0.01 |
| Stearic acid (C18:0) | 2.37 ± 0.03 |
| Oleic acid acid (C18:1) | 64.06 ± 0.03 |
| Linoleic acid (C18:2) | 17.69 ± 0.98 |
| Linolenic acid (C18:3) | 9.03 ± 0.05 |
| Arachidic acid (C20:0) | 0.73 ± 0.02 |
| Behenic acid (C22:0) | 0.37 ± 0.01 |
| Erucic acid (C22:1) | 0.07 ± 0.01 |
| Lignoceric acid (C24:0) | 0.19 ± 0.02 |
| Σ Unsaturated | 91.11 |
| Σ Saturated | 8.89 |
| Mean molecular weight (g mol-1)a | 883.27 |

a Obtained from the fatty acid composition.

**Supplementary material (Table S2)**

**Table S2.** Determined acid or basic of the quail eggshell calcined at 900 ºC for 3h with the utilization Hammett indicators.

| Indicator | pH  range | pKa | Acidic  form | Basic  form | Observed  color |
| --- | --- | --- | --- | --- | --- |
| Phenolphthalein | 8.2-10.0 | 9.8 | colorless | pink | pink |
| Bromothymol blue | 6.0-7.6 | 7.2 | yellow | blue | blue |
| Phenol red | 6.6-8.0 | 7.4 | yellow | red | red |

**Supplementary material (Table S3)**

**Table S3.** Binding energy values of the constituent elements of natural quail eggshell and calcined quail eggshell and their atomic concentrations (wt. %) determined by XPS.

| Element | Natural quail eggshell | | Calcined quail eggshell | |
| --- | --- | --- | --- | --- |
| BE (eV) | AC (wt. %) | BE (eV) | AC (wt. %) |
| C 1s | 284.8 | 42.23 | 284.8 | 23.81 |
| C 1s | 287.3 | 4.6 | - | - |
| C 1s | 290.0 | 18.64 | 289.5 | 10.15 |
| C Total | - | 65.47 | - | 33.95 |
| O 1s | 531.6 | 22.52 | 531.2 | 41.21 |
| N 1s | 399.2 | 4.84 | - | - |
| S 2p3/2 | 162.5 | 0.28 | - | - |
| S 2p3/2 | 168.2 | 0.10 | - | - |
| S Total | - | 0.38 | - | - |
| Ca 2p3/2 | 347.4 | 4.83 | 346.5 | 21.30 |
| Mg 2s | 89.3 | 1.22 | 88.5 | 2.31 |
| P 2p3/2 | 133.8 | 0.46 | 133.6 | 1.23 |

**Supplementary material (Table S4)**

**Table S4.** Textural properties of natural quail eggshell and calcined quail eggshell at 900 oC for 3h.

| Material | SBETa (m2 g-1) | VPb (cm3 g-1) | DPc (nm) |
| --- | --- | --- | --- |
| Natural quail eggshell | 0.28 | 0.001 | 28.9 |
| Calcined quail eggshell | 4.56 | 0.025 | 24.3 |

aBET surface area, bAverage pore volume, cAverage pore diameter.
